# Supplementary material for: QM/MM studies on photo-induced cycloaddition and (6-4) reactions of the thymidine:4-selenothymidine dimer in aqueous solution
Source: Research Square preprint supplement (doi:10.21203/rs.3.rs-6547757/v1), 2025-05-15
Supplement: Supplementary file 2 [file 51a02734f2d7cafdaa67c7b8.docx]

**QM/MM studies on photo-induced cycloaddition and (6-4) reactions of the thymidine:4-selenothymidine dimer in an aqueous solution**

xxx1, xxx1, xxx2*, xxx2* and xxx1*

1) xxx

2) xxx

*Author to whom correspondence should be addressed. Email: xxx

**Table of Contents**

1. Active spaces in QM(MS-CASPT2//CASSCF)/MM calculations
2. Additional LIIC paths of Tp4SeT
3. Cartesian coordinates for all optimized structures
4. Active spaces in QM(MS-CASPT2//CASSCF)/MM calculations


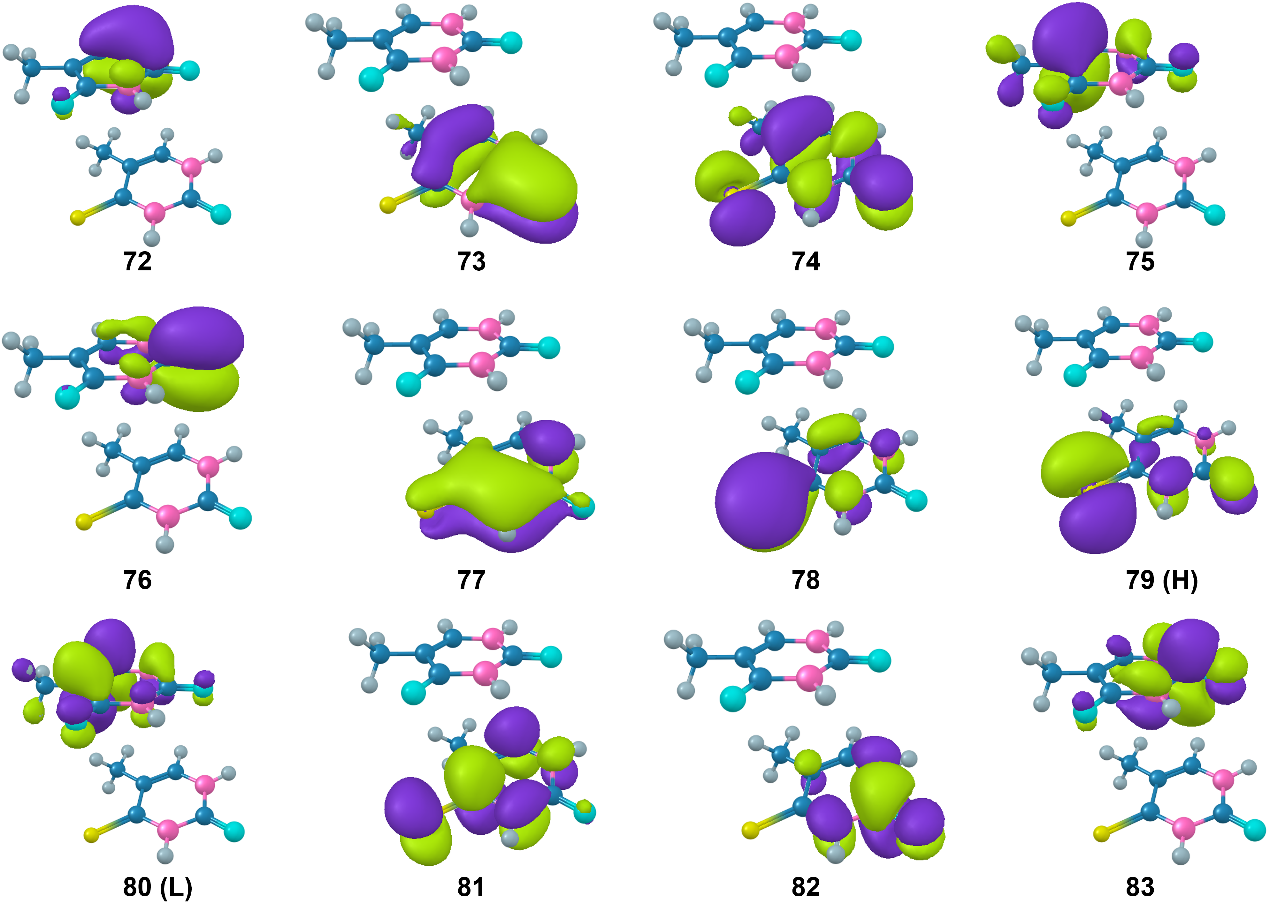


**Figure S1.** Active space for the QM(MS-CASPT2//CASSCF)/MM calculations.

1. Additional LIIC paths of Tp4SeT


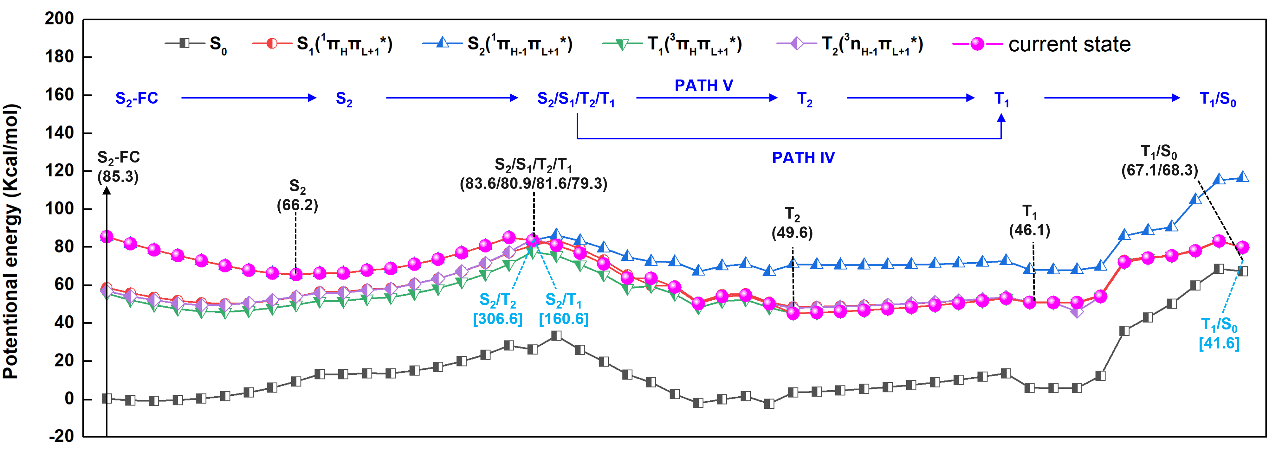


**Figure S2.** QM(MS-CASPT2//CASSCF)/MM computed LIIC paths of Tp4SeT connecting the S2 Franck–Condon point to the crossing point S0/T1. Values in parentheses are energies, and values in square brackets are SOCs.

1. Cartesian coordinates for all optimized structures

S0

N 0.915279755 1.142538994 -2.130760197

C -0.342404012 0.606806488 -2.182224277

O -1.318412307 1.249459040 -2.446969745

N -0.390218235 -0.741789730 -1.899802676

C 0.665281293 -1.572656601 -1.570427066

O 0.489993023 -2.729569520 -1.348999567

C 1.987370499 -0.913585568 -1.519534915

C 3.175611743 -1.751425265 -1.145512764

C 2.043313096 0.403356235 -1.805367847

H -1.296799861 -1.165428826 -1.936242541

H 3.047100196 -2.180464403 -0.151759023

H 3.295886318 -2.581123210 -1.841237831

H 4.087392964 -1.154257100 -1.154111217

H 2.966115846 0.962719014 -1.791730024

N -2.509569847 1.431707939 1.082835386

C -3.297139224 0.369883742 1.456344659

O -4.473575127 0.318787731 1.255050650

N -2.600177915 -0.634531148 2.089834454

C -1.246331963 -0.705757384 2.321620514

Se -0.527108192 -2.182158649 3.032972195

C -0.489918007 0.493689485 1.935936666

C 0.981632613 0.607822000 2.216900702

C -1.165575535 1.473858245 1.331661159

H -3.154325498 -1.428902230 2.342487131

H 1.358146226 1.565714039 1.857028771

H 1.182719592 0.539500201 3.286179048

H 1.541071535 -0.190465831 1.731021667

H -0.674650006 2.379250848 1.006208324

H 0.989027188 2.106725480 -2.373055404

H -2.954832263 2.145850089 0.546935665

S1

N 0.891806288 1.165422825 -2.168192307

C -0.366502702 0.628774636 -2.228911379

O -1.334448208 1.261122186 -2.535986105

N -0.418561667 -0.714110965 -1.913113352

C 0.629633199 -1.534681746 -1.549302638

O 0.453278753 -2.686215573 -1.293511004

C 1.953142896 -0.878372711 -1.505694168

C 3.139432143 -1.713370420 -1.118288685

C 2.012965553 0.433508691 -1.814061277

H -1.328064802 -1.132396857 -1.934889800

H 3.008408602 -2.134812007 -0.121440162

H 3.262649933 -2.550167040 -1.805309273

H 4.052232258 -1.117569485 -1.128783090

H 2.937433281 0.990522770 -1.804332623

N -2.503956737 1.402564703 1.065012675

C -3.289062831 0.340621706 1.429650678

O -4.462468348 0.280297844 1.212315237

N -2.602654025 -0.664777728 2.080139525

C -1.228048534 -0.642956544 2.327034230

Se -0.500410888 -2.244257848 3.080571467

C -0.485545130 0.462710195 1.976578802

C 0.991013449 0.564741072 2.259491363

C -1.142450018 1.495989459 1.342302120

H -3.172896497 -1.421164209 2.388810260

H 1.384864851 1.512991729 1.897284544

H 1.195681138 0.509453389 3.330076306

H 1.546994949 -0.234246733 1.765974131

H -0.661305527 2.415369767 1.057505899

H 0.966683922 2.128504584 -2.414253917

H -2.956385208 2.101184258 0.516488224

S2

N 0.904366120 1.171377127 -2.110771257

C -0.358202466 0.655460383 -2.206850461

O -1.314225435 1.307815368 -2.514847596

N -0.437833170 -0.690224815 -1.911780444

C 0.593863860 -1.539190569 -1.557581198

O 0.393035374 -2.692749595 -1.340805855

C 1.926338645 -0.904155084 -1.472878977

C 3.088966451 -1.763569031 -1.068723139

C 2.011607097 0.412432223 -1.757451371

H -1.347561210 -1.101597587 -1.987647025

H 2.927632394 -2.186897579 -0.077392813

H 3.209138524 -2.597698560 -1.759272413

H 4.012212895 -1.184348759 -1.057306351

H 2.943112601 0.955974253 -1.719660062

N -2.554166043 1.382131746 1.078481993

C -3.273953662 0.269119525 1.405793335

O -4.443200983 0.138373008 1.196839988

N -2.507308011 -0.717521941 2.019746690

C -1.189483229 -0.625003152 2.288304387

Se -0.520920809 -2.303727824 3.119755782

C -0.484481473 0.485143182 1.975356116

C 0.982755003 0.641845742 2.265307053

C -1.211861425 1.550396845 1.310753900

H -2.991066305 -1.554905911 2.276134226

H 1.342085824 1.603027787 1.896006935

H 1.185656981 0.596820479 3.336298859

H 1.571419750 -0.144020361 1.791602534

H -0.807627370 2.530516535 1.129081276

H 1.003228929 2.131445503 -2.360236758

H -3.072622706 2.090353783 0.599071747

T1

N 0.883934533 1.143326669 -2.232103165

C -0.384192361 0.628445969 -2.243555328

O -1.344272432 1.254957160 -2.584704756

N -0.458455662 -0.686953922 -1.826832102

C 0.578511560 -1.501569131 -1.423662201

O 0.382753851 -2.625559351 -1.076309239

C 1.917792067 -0.877148909 -1.457381470

C 3.094384448 -1.712702503 -1.042579364

C 1.998137266 0.410355260 -1.856017556

H -1.376304753 -1.087045584 -1.807405492

H 2.979332038 -2.064128055 -0.017049975

H 3.181318221 -2.595612877 -1.675516101

H 4.019535602 -1.140701823 -1.114317680

H 2.933872923 0.945735948 -1.903452660

N -2.519216939 1.384222155 1.101002120

C -3.282441294 0.288032103 1.421340251

O -4.455628896 0.225013278 1.179689020

N -2.587112793 -0.716251810 2.038035780

C -1.200292251 -0.691224822 2.283819874

Se -0.471095638 -2.283682108 3.009926494

C -0.480828583 0.411542136 1.993431420

C 0.995582122 0.575787631 2.260366839

C -1.169531839 1.507639857 1.384077727

H -3.111957313 -1.535575881 2.256269986

H 1.333624634 1.542577933 1.889673758

H 1.212543598 0.533309271 3.327154571

H 1.582749403 -0.197176946 1.768547938

H -0.709106600 2.456208338 1.176226291

H 0.975635505 2.081276018 -2.557094510

H -3.001307774 2.106406116 0.610160609

T2

N 0.898707511 1.161217400 -2.163412635

C -0.358992454 0.624395080 -2.218550809

O -1.331354109 1.258486577 -2.508524711

N -0.407579535 -0.721151108 -1.913079072

C 0.642175176 -1.542906304 -1.558599388

O 0.467964454 -2.695720549 -1.309230664

C 1.966123191 -0.886305798 -1.516633712

C 3.153878846 -1.721818348 -1.135690239

C 2.022933258 0.428300857 -1.817885408

H -1.317021523 -1.139854764 -1.930605671

H 3.028053625 -2.142970142 -0.137968362

H 3.272876511 -2.558765995 -1.823155871

H 4.066783685 -1.126417694 -1.151244066

H 2.946532018 0.986532524 -1.808087120

N -2.509501779 1.415281891 1.074834972

C -3.293432819 0.354264721 1.441005694

O -4.472616692 0.305957088 1.224408885

N -2.620054574 -0.652310143 2.088229232

C -1.235095767 -0.651437064 2.328417965

Se -0.499707664 -2.239931607 3.068610341

C -0.478531033 0.494178408 1.937620593

C 0.994351727 0.602673947 2.230000061

C -1.141404158 1.487138668 1.326066401

H -3.190895906 -1.428694052 2.347204466

H 1.377370267 1.557468388 1.871780455

H 1.194562833 0.545925301 3.301729075

H 1.563761131 -0.187392914 1.737352897

H -0.666508768 2.406601093 1.024102215

H 0.971614441 2.126372318 -2.401878483

H -2.956842084 2.107463148 0.514184435

T3

N 0.906968206 1.183196846 -2.120112796

C -0.335932052 0.609961379 -2.179863496

O -1.315749836 1.240315016 -2.460121191

N -0.393109009 -0.741855406 -1.898278185

C 0.655005518 -1.580485334 -1.553107804

O 0.463603451 -2.739829637 -1.330235238

C 1.963396293 -0.954238509 -1.483255232

C 3.154896745 -1.766452248 -1.107128654

C 2.080159448 0.530287653 -1.777408979

H -1.301644797 -1.158014502 -1.945313417

H 3.031159922 -2.196053039 -0.110699330

H 3.285561906 -2.602703328 -1.796013676

H 4.060425748 -1.161223481 -1.117020665

H 2.998318235 1.083396795 -1.750888864

N -2.508084632 1.418903273 1.075576212

C -3.293750077 0.356814122 1.451031418

O -4.471889883 0.307846563 1.249429793

N -2.600385103 -0.646132253 2.084355940

C -1.239079144 -0.718949323 2.315837194

Se -0.525166101 -2.188646119 3.023301878

C -0.484838355 0.482884141 1.924934145

C 0.987654412 0.594786724 2.200173986

C -1.160190580 1.464013511 1.322461598

H -3.155145294 -1.438878423 2.337070626

H 1.367488951 1.550050837 1.837867951

H 1.194591509 0.526999669 3.268531447

H 1.544483681 -0.205907905 1.713905391

H -0.670787219 2.370027018 0.997738906

H 0.923878261 2.151295555 -2.362550543

H -2.956019335 2.133282235 0.542771135

S1S0

N 0.961802320 1.176189539 -2.212772082

C -0.289907253 0.627460038 -2.270503489

O -1.267004870 1.253197805 -2.566550209

N -0.327086103 -0.717596799 -1.964342208

C 0.731159913 -1.530709694 -1.611294245

O 0.570306566 -2.687113630 -1.373392093

C 2.046074607 -0.857253247 -1.551245015

C 3.237036754 -1.679807977 -1.152941449

C 2.090486115 0.458389589 -1.850961897

H -1.231468183 -1.146985787 -1.987584874

H 3.097789344 -2.105563047 -0.158965946

H 3.378524420 -2.512833595 -1.840889293

H 4.142931254 -1.073628035 -1.149558155

H 3.006458902 1.028770971 -1.829230132

N -2.387824942 1.111500261 0.738644559

C -3.251467418 0.242042758 1.337488205

O -4.410763333 0.145746818 1.070202089

N -2.660825125 -0.533568346 2.355458298

C -1.284422882 -0.470981743 2.575779822

Se -1.127525029 -2.284267611 3.278426781

C -0.481988974 0.447335108 2.104880376

C 1.010685497 0.449851457 2.259148837

C -1.110704098 1.461547117 1.211610093

H -3.242558332 -0.575080269 3.173235721

H 1.355757414 1.435017625 2.581982234

H 1.340382127 -0.269525271 3.008369279

H 1.514132592 0.218582568 1.318345112

H -0.937513111 2.522273900 1.372033023

H 1.021516057 2.147673538 -2.427831441

H -2.805189203 1.675889049 0.026381857

S2S1

N 0.891026249 1.012364555 -2.446633749

C -0.402237660 0.626686777 -2.215429266

O -1.348819461 1.283217633 -2.537498055

N -0.518303149 -0.586413023 -1.563878381

C 0.504795069 -1.390372338 -1.108621992

O 0.276527932 -2.386418686 -0.487205513

C 1.866273942 -0.928130682 -1.439191373

C 3.023230423 -1.792878179 -1.028025884

C 1.986340439 0.247932786 -2.083557804

H -1.452443744 -0.878283047 -1.346479794

H 3.035171107 -1.939650009 0.052061188

H 2.946190323 -2.779282807 -1.485620930

H 3.968889715 -1.342534069 -1.329821749

H 2.942976931 0.668722242 -2.350524953

N -2.480796670 1.306518032 1.000247354

C -3.363363831 0.353565270 1.696000605

O -4.497564626 0.166309498 1.265806384

N -2.489659474 -0.818442822 1.916726606

C -1.218686124 -0.719365860 2.229819358

Se -0.382264458 -2.345865394 2.822328466

C -0.532204878 0.472478161 2.076207039

C 0.893407462 0.718228536 2.503869116

C -1.217413426 1.442576726 1.272984181

H -2.944827829 -1.710635600 1.916638524

H 1.193356340 1.726905472 2.216290026

H 1.013962231 0.645786118 3.585400482

H 1.599024133 0.021597142 2.049271468

H -0.687906838 2.277009490 0.834961444

H 1.007674119 1.863903355 -2.952644227

H -2.945448813 1.946205361 0.379480260

T2T1

N 0.927645013 1.167501613 -2.162919272

C -0.321608060 0.612814655 -2.231252724

O -1.300351218 1.237893766 -2.523365090

N -0.355264496 -0.733757300 -1.933225511

C 0.701546281 -1.539701950 -1.561259790

O 0.539034503 -2.690522484 -1.298787880

C 2.016528260 -0.865214677 -1.506213095

C 3.210646764 -1.686066022 -1.113200640

C 2.059517503 0.449343728 -1.809665709

H -1.259143217 -1.164348870 -1.955243931

H 3.079215132 -2.112449442 -0.118106753

H 3.349475600 -2.518808790 -1.801568651

H 4.115213934 -1.077975231 -1.114680886

H 2.975533847 1.019760564 -1.793888448

N -2.520524657 1.310509230 0.948882304

C -3.346889294 0.293481686 1.365165387

O -4.509200520 0.240060984 1.075433397

N -2.733551600 -0.654930116 2.135136318

C -1.391626033 -0.618219470 2.566308766

Se -0.613409884 -2.259042700 3.171500178

C -0.550825927 0.403843888 1.963499974

C 0.913938942 0.485818545 2.293364539

C -1.155700828 1.316670218 1.205318482

H -3.332439406 -1.405560148 2.400694221

H 1.350995729 1.393009778 1.877840661

H 1.073070097 0.496562610 3.373844276

H 1.476413494 -0.357272369 1.882183439

H -0.620806459 2.158115740 0.788375468

H 0.990644147 2.131162282 -2.409999866

H -2.896365644 1.900090443 0.236191963

T3T2

N 0.901884226 1.151324289 -2.193781503

C -0.354721131 0.602806956 -2.196233150

O -1.330783518 1.232361403 -2.485392924

N -0.417210397 -0.735376350 -1.859188502

C 0.638568865 -1.570816276 -1.541023639

O 0.460394155 -2.733277809 -1.327895793

C 1.946501446 -0.929049423 -1.479563607

C 3.141061670 -1.746244456 -1.113685245

C 2.038995449 0.550046709 -1.663194770

H -1.324526691 -1.155313486 -1.900746728

H 3.027240486 -2.171827865 -0.114230323

H 3.261393052 -2.584430864 -1.801435986

H 4.048032739 -1.142771007 -1.132189912

H 2.973981161 0.968975402 -2.009935490

N -2.504295389 1.414447653 1.073475706

C -3.287869759 0.348668312 1.440577701

O -4.464162207 0.293812544 1.226088213

N -2.596893295 -0.652094239 2.080125221

C -1.233192708 -0.711091739 2.316812742

Se -0.515110342 -2.201376721 3.026958577

C -0.479656879 0.487453195 1.933910452

C 0.991636386 0.604387846 2.219419241

C -1.155679931 1.470052524 1.330507336

H -3.151420976 -1.446400984 2.327290198

H 1.369911652 1.562320970 1.862715892

H 1.191034268 0.534849145 3.289270872

H 1.555677991 -0.190868397 1.733106927

H -0.670944654 2.381093485 1.014502521

H 0.923131280 2.121128012 -2.431255922

H -2.954383087 2.129252788 0.543005407

S0T1

N 1.026816545 0.967210125 -2.587641859

C -0.270455375 0.650957338 -2.301948016

O -1.206011117 1.309688889 -2.650231282

N -0.412070165 -0.511370461 -1.559904604

C 0.579733954 -1.345985484 -1.111504870

O 0.338414613 -2.290316060 -0.421078471

C 1.953058254 -0.982814149 -1.526438583

C 3.081101305 -1.878133497 -1.109440434

C 2.102644322 0.163630496 -2.233043248

H -1.346753405 -0.717628846 -1.261116201

H 3.154127766 -1.933786995 -0.022842179

H 2.920987849 -2.893701644 -1.471611724

H 4.028767137 -1.513025686 -1.504405785

H 3.066675288 0.522621907 -2.554839468

N -2.411395365 1.155721736 0.810346230

C -3.275363004 0.219320442 1.350705237

O -4.409971758 0.070274326 0.994095415

N -2.713352905 -0.534218160 2.374498704

C -1.311088409 -0.679859301 2.492921634

Se -0.648878831 -2.456175873 2.842295202

C -0.575244875 0.366616686 2.121849757

C 0.901974286 0.435734273 1.918416803

C -1.404560881 1.562001432 1.723501783

H -3.273572628 -1.326906364 2.612007762

H 1.116137828 0.835084001 0.923269257

H 1.355893714 1.125315047 2.636261982

H 1.375269174 -0.535688114 2.019946893

H -1.755053791 2.198810470 2.539334358

H 1.163667909 1.779325453 -3.150105802

H -2.890406886 1.862082784 0.285896158

S1T1

N 0.887188741 1.192234792 -2.126281511

C -0.362215572 0.649419465 -2.257436086

O -1.327543959 1.288803157 -2.560776779

N -0.410173419 -0.709072394 -2.018691870

C 0.632617330 -1.540421515 -1.662045375

O 0.462522781 -2.707464739 -1.494299013

C 1.943239852 -0.872003449 -1.514484797

C 3.119905264 -1.713179350 -1.113034568

C 1.999393072 0.456101051 -1.750938231

H -1.311202960 -1.136306307 -2.107836821

H 2.939722877 -2.196288867 -0.152642702

H 3.294349000 -2.505416324 -1.840686672

H 4.022131069 -1.105900381 -1.036997232

H 2.915248535 1.021897265 -1.669914860

N -2.507514385 1.407376231 1.062452452

C -3.285525551 0.350501630 1.407482263

O -4.457812551 0.261496891 1.178199413

N -2.613872022 -0.672097530 2.079617994

C -1.266647511 -0.621039239 2.337152564

Se -0.466829713 -2.159353009 3.179548250

C -0.508011900 0.432361583 2.000833842

C 0.951022265 0.377257859 2.349042759

C -1.118858444 1.485582935 1.284452579

H -3.210988951 -1.409405250 2.386206168

H 1.499693806 1.258808306 2.022176539

H 1.092572311 0.300670919 3.436318339

H 1.439626261 -0.484168242 1.866859842

H -0.675886233 2.461411897 1.169687147

H 0.955361466 2.172852114 -2.291416198

H -2.948797955 2.068939023 0.459988223

S1T2

N 0.890561193 1.170906265 -2.111972600

C -0.358225782 0.621892146 -2.231922731

O -1.330080623 1.262639269 -2.512896017

N -0.398226243 -0.735857960 -1.999858780

C 0.658488695 -1.572848221 -1.688595367

O 0.501473465 -2.741931852 -1.552429404

C 1.967362328 -0.895939438 -1.543791559

C 3.151417944 -1.735022125 -1.160231300

C 2.014745499 0.433862229 -1.770139359

H -1.296211792 -1.170196448 -2.088734528

H 2.986973378 -2.216313632 -0.195514695

H 3.313525642 -2.529980145 -1.887188853

H 4.054221150 -1.127469492 -1.099574760

H 2.928471479 1.003815850 -1.696348899

N -2.513721814 1.434543678 1.092713490

C -3.303934426 0.384150408 1.454111314

O -4.461560269 0.290610328 1.199669525

N -2.631643773 -0.627082930 2.161588397

C -1.284429041 -0.647698702 2.361107635

Se -0.489397535 -2.204067196 3.193881608

C -0.501866760 0.500338142 1.964768814

C 0.953946948 0.480426948 2.309520638

C -1.137918710 1.488852906 1.334096517

H -3.210331073 -1.422374882 2.326261964

H 1.470158990 1.372639666 1.954037042

H 1.095936195 0.410900932 3.391734711

H 1.456170554 -0.379409800 1.833153849

H -0.646795142 2.396092898 1.019773666

H 0.960314792 2.144013214 -2.315844740

H -2.939161441 2.093921010 0.479851659

S2T2

N 0.960535374 0.892162758 -2.669911876

C -0.384098946 0.726391714 -2.497430875

O -1.211748425 1.453525340 -2.963227211

N -0.713350358 -0.364901401 -1.713511826

C 0.147417642 -1.206811693 -1.048319842

O -0.273065652 -2.029075635 -0.285379835

C 1.578505999 -1.019785171 -1.351939046

C 2.564610059 -1.992428200 -0.767765644

C 1.906950289 0.028645751 -2.137691668

H -1.692123180 -0.502800028 -1.554669369

H 2.430785229 -2.080162078 0.309010366

H 2.413977639 -2.987584483 -1.188539203

H 3.586251304 -1.677913231 -0.982377245

H 2.928191592 0.258737760 -2.395773762

N -2.809902897 1.111609790 1.697937658

C -3.188997128 -0.170143937 1.433014906

O -4.227111226 -0.512691123 0.958126231

N -2.218194006 -1.082050224 1.924088022

C -0.987660937 -0.782554534 2.118499435

Se -0.068454782 -2.607098833 2.762448446

C -0.499210619 0.505403988 1.847463310

C 0.954555095 0.832247130 1.990599797

C -1.531394211 1.496555462 1.961556550

H -2.499981949 -2.003849549 2.224851087

H 1.158317096 1.844553158 1.636181488

H 1.293080957 0.754732929 3.031091526

H 1.569362584 0.135864359 1.424138090

H -1.427428895 2.444342676 2.477297597

H 1.236304572 1.657639684 -3.246186133

H -3.550693725 1.786161396 1.699446549

S0CCCSe

N 0.375480146 0.597226797 -1.454407447

C -0.558586968 -0.025268431 -2.239996584

O -1.247450749 0.538567843 -3.034321057

N -0.618643416 -1.410217786 -2.081342017

C 0.297591002 -2.202913266 -1.428683066

O 0.363579548 -3.371496745 -1.633112530

C 1.202321915 -1.497758758 -0.433970541

C 2.657671911 -1.808049670 -0.772531462

C 0.876645699 -0.013711893 -0.257964310

H -1.195539630 -1.883058815 -2.751297374

H 2.820754015 -2.882360624 -0.807580903

H 2.904856494 -1.393714393 -1.754185448

H 3.324057159 -1.368948808 -0.031965433

H 1.779070627 0.517282995 0.024458578

N -2.020286874 1.883795578 1.840516880

C -2.468098946 0.789668888 1.133193576

O -3.625037123 0.601627673 0.894233228

N -1.470582405 -0.044622681 0.700951084

C -0.092287898 0.008925119 1.021077707

Se 0.660024441 -1.985454533 1.406671584

C 0.216039411 1.055286027 2.041761411

C 1.560736666 1.108870700 2.715549202

C -0.743015108 1.920346639 2.359868360

H -1.817759686 -0.863060608 0.247089606

H 1.637353272 1.997787797 3.340852715

H 1.711010009 0.233220384 3.346974957

H 2.389489554 1.131694215 2.007439466

H -0.559555876 2.726000347 3.055251621

H 0.311449154 1.594809426 -1.485631106

H -2.734950290 2.453776494 2.239331239

T1CC

N 0.298023271 0.781969624 -1.118109452

C -0.680466193 0.410529682 -2.007671061

O -1.422913262 1.190545600 -2.526296928

N -0.720760459 -0.939785996 -2.320568250

C 0.134655020 -1.909823171 -1.869140072

O 0.125064814 -3.021247464 -2.289329356

C 1.070179530 -1.468652253 -0.802929742

C 2.231064147 -2.361741500 -0.512632686

C 0.880937358 -0.125521870 -0.157151085

H -1.378326416 -1.206810450 -3.026871792

H 1.905259975 -3.398482054 -0.459493284

H 2.970204624 -2.300384408 -1.315754943

H 2.720179445 -2.088554353 0.419531961

H 1.866552490 0.248850046 0.109839358

N -2.430042047 1.190430392 1.833781337

C -2.524424228 -0.056357208 1.269497099

O -3.569502785 -0.618456150 1.136226571

N -1.329608766 -0.583449964 0.827390140

C -0.005753289 -0.137779589 1.184550101

Se 0.811706628 -1.350459271 2.578634368

C -0.040816939 1.248865097 1.802448186

C 1.235928370 1.995790878 2.101405238

C -1.220488247 1.797717214 2.072126109

H -1.429243338 -1.563717305 0.656270347

H 1.007286888 2.956359284 2.559097027

H 1.880629843 1.445512279 2.782600119

H 1.818925649 2.199266463 1.204543089

H -1.286736254 2.784415027 2.505249067

H 0.182041657 1.731549949 -0.825892679

H -3.285282177 1.617947437 2.105618473

S0T1CC

N 0.400328997 0.562634237 -1.349277956

C -0.663535808 0.233928666 -2.157150457

O -1.347207397 1.041471156 -2.710388771

N -0.862679473 -1.129454986 -2.345168679

C -0.051261517 -2.144759544 -1.900486987

O -0.167344034 -3.265745466 -2.283276785

C 0.961618950 -1.735178264 -0.896251277

C 2.210715292 -2.555785346 -0.815459929

C 0.880810557 -0.340047009 -0.327312930

H -1.561486204 -1.375548802 -3.019100226

H 1.973857968 -3.608958575 -0.945433487

H 2.898979997 -2.267834276 -1.619097498

H 2.724841994 -2.412654892 0.132979777

H 1.892154752 -0.046049332 -0.064771412

N -2.039809487 1.465144390 2.010958850

C -2.422741978 0.358500615 1.292747549

O -3.565315565 0.023145091 1.189806688

N -1.387638581 -0.297978449 0.661583011

C 0.006877198 -0.209242368 1.007869999

Se 0.541003752 -1.697136357 2.249260266

C 0.302430915 1.092047838 1.726175112

C 1.722181655 1.546174434 1.957486081

C -0.720916137 1.815524796 2.172279629

H -1.695635520 -1.191564075 0.333059678

H 2.217256473 1.856421741 1.033616806

H 1.732686733 2.402184204 2.630824527

H 2.333267789 0.762257210 2.406845129

H -0.558169294 2.740528167 2.705795391

H 0.381520456 1.533789881 -1.106021753

H -2.771681393 2.003590892 2.419919844

T1CSe

N 0.625807925 0.640135531 -1.429707596

C -0.475037649 0.099488260 -2.029936527

O -1.336234023 0.755176448 -2.538123648

N -0.509116843 -1.286298222 -2.019034121

C 0.410745603 -2.155147188 -1.480333936

O 0.323287315 -3.327454365 -1.655427802

C 1.522205588 -1.517799643 -0.680548809

C 2.797071317 -2.342772062 -0.665551126

C 1.689816481 -0.108696055 -0.957608252

H -1.272019449 -1.702307075 -2.517120465

H 2.602832633 -3.341631008 -0.285704638

H 3.192949569 -2.442788811 -1.677815376

H 3.551780491 -1.863860539 -0.042462823

H 2.515336466 0.447080654 -0.546974263

N -2.581500148 1.334162696 1.473032195

C -2.885551388 0.020686967 1.225610143

O -3.994934226 -0.359516424 0.978995564

N -1.798936190 -0.818317015 1.278003597

C -0.505000919 -0.459872852 1.671355746

Se 0.816569476 -1.796899212 1.489732261

C -0.278466356 0.930205866 1.981319076

C 1.049393765 1.431152297 2.485498410

C -1.324829989 1.760864993 1.866700940

H -2.014045318 -1.786105795 1.151835464

H 1.054756315 2.521501651 2.502532964

H 1.246145766 1.075849050 3.498430683

H 1.875791279 1.093832657 1.862500956

H -1.251149264 2.813020259 2.093130292

H 0.681492670 1.635559144 -1.461537533

H -3.344425307 1.973421815 1.424861883

S0T1CSe

N 0.758345389 0.610195688 -1.418511153

C -0.399840821 0.198088465 -2.015703781

O -1.170653610 0.941828784 -2.544705586

N -0.616567845 -1.170879219 -1.974892420

C 0.178967375 -2.145440945 -1.424165284

O -0.062899802 -3.297250018 -1.592452778

C 1.353320918 -1.658672754 -0.585290432

C 2.539662956 -2.616008263 -0.767086074

C 1.753960109 -0.263818079 -0.986482046

H -1.426174734 -1.491111948 -2.470100019

H 2.261302583 -3.629897383 -0.491280622

H 2.845554547 -2.617229805 -1.813301527

H 3.386143615 -2.293527827 -0.159563467

H 2.585023495 0.200394222 -0.481119001

N -2.749667376 1.234967172 1.459399922

C -3.003029320 -0.095087029 1.235293558

O -4.104585166 -0.528034231 1.045508054

N -1.877605373 -0.880855272 1.239003969

C -0.584463926 -0.438662867 1.547204911

Se 0.850198891 -1.797812868 1.325419370

C -0.397429545 0.949960148 1.798515960

C 0.939942119 1.529290764 2.171761358

C -1.490159773 1.734136377 1.744487682

H -2.046234377 -1.858169508 1.130076632

H 0.847306302 2.599736094 2.352531926

H 1.332986166 1.066585739 3.077835472

H 1.681810273 1.383675128 1.388247199

H -1.446986582 2.794597668 1.935629902

H 0.959247886 1.581151743 -1.527135303

H -3.543065672 1.838014395 1.430054149
